# Supplementary material for: pH and glucose dual-responsive phenylboronic acid hydrogels for smart insulin delivery
Source: Royal Society of Chemistry journal article supplement (doi:10.1039/d4sm01004c), 2024-01-01
Supplement: d4sm01004c1.pdf [file d4sm01004c1.pdf]

## Supplementary Information

# **pH and glucose dual-responsive phenylboronic acid hydrogel for smart insulin delivery**

*Keke Yang<sup>a</sup>, Bo Hou<sup>a</sup>, Dewei Ma<sup>a</sup>, Mingwei Peng<sup>a</sup>, Qinglong Liu<sup>a</sup>, Ziwen Heng<sup>a</sup>,*

*Zhongwei Gu<sup>a</sup>, Xuhan Liu<sup>b\*</sup>, Siyuan Chen<sup>a\*</sup>*

- a. Research Institute for Biomaterials, Tech Institute for Advanced Materials Bioinspired Biomedical Materials & Devices Center, College of Materials Science and Engineering, Jiangsu Collaborative Innovation Center for Advanced Inorganic Function Composites, Suqian Advanced Materials Industry Technology Innovation Center, Nanjing Tech University, Nanjing, China.
- b. School of Pharmacy, Shenzhen University Medical School, Shenzhen University, No. 1066 Xueyuan Avenue, Shenzhen, China. E-mail: liuxuhan891130@163.com.

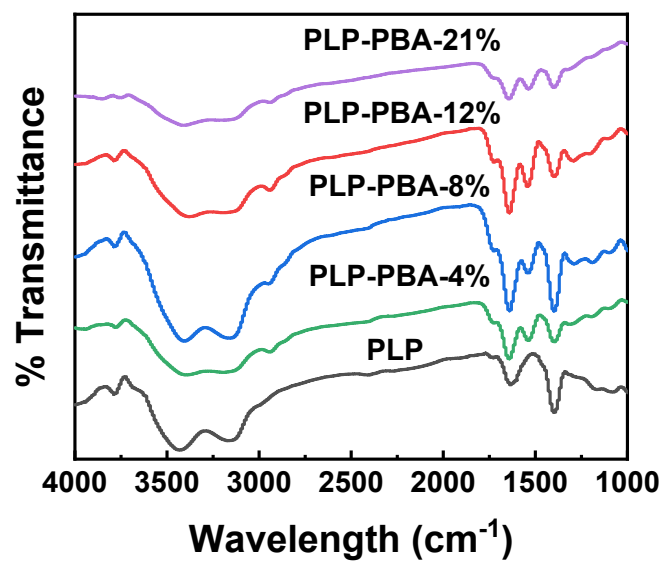

Fig. S1. FT-IR spectra of PLP and PLP-PBA series polymers.

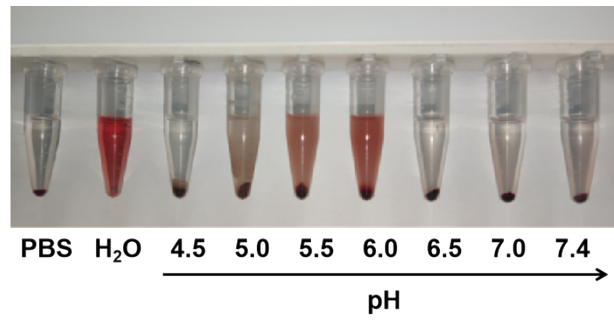

**Fig. S2. Hemolysis images of PLP-PBA-12% series polymers at a polymer concentration of 1.0 mg/mL.**

**Tab. S1. Hydrogel formulation optimization.**

| <b>LME : PLP-PBA<br/>molar ratio (n<sub>-NH<sub>2</sub></sub>/n<sub>-COOH</sub>)</b> | <b>LME-(PLP-PBA-<br/>8%)</b>                                                                    | <b>LME-(PLP-PBA-<br/>12%)</b>                                                                     | <b>LME-(PLP-PBA-<br/>21%)</b>                                                                     |
|--------------------------------------------------------------------------------------|-------------------------------------------------------------------------------------------------|---------------------------------------------------------------------------------------------------|---------------------------------------------------------------------------------------------------|
| <b>10</b>                                                                            | <b>Formed</b>                                                                                   | <b>Formed</b>                                                                                     | <b>Formed</b>  |
| <b>6.7</b>                                                                           | <b>Formed</b>                                                                                   | <b>Formed</b>  | <b>Not form</b>                                                                                   |
| <b>5</b>                                                                             | <b>Formed</b>                                                                                   | <b>Not form</b>                                                                                   | <b>Not form</b>                                                                                   |
| <b>3.3</b>                                                                           | <b>Formed</b>                                                                                   | <b>Not form</b>                                                                                   | <b>Not form</b>                                                                                   |
| <b>2.5</b>                                                                           | <b>Formed</b>  | <b>Not form</b>                                                                                   | <b>Not form</b>                                                                                   |

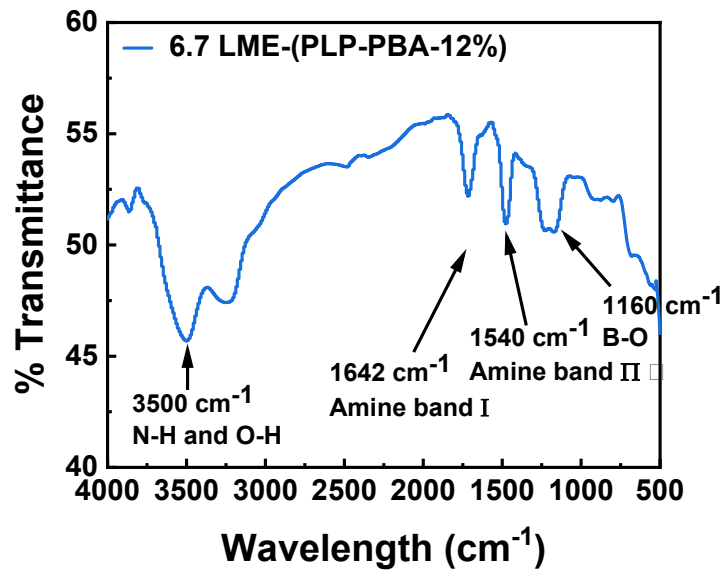

Fig. S3. FT-IR spectra of 6.7 LME-(PLP-PBA-12%) hydrogel.

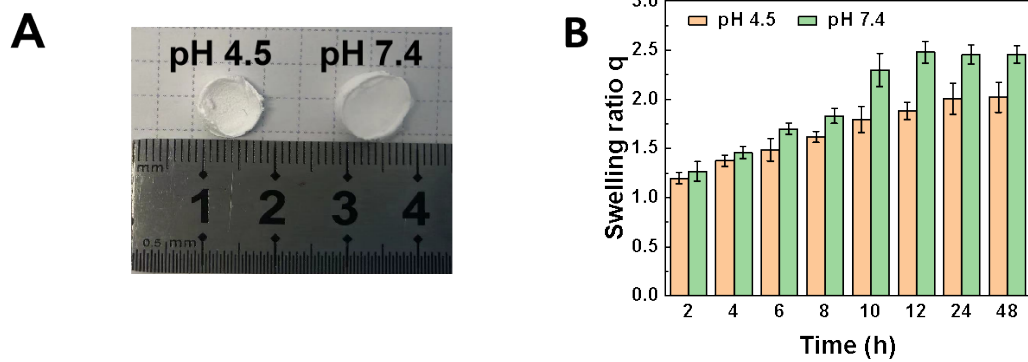

**Fig. S4. (A) Macroscopic appearance of 6.7 LME- (PLP-PBA-12%) hydrogel at pH 4.5 and 7.4. (B) Swelling ratio  $q$  of 6.7 LME- (PLP-PBA-12%) hydrogel at pH 4.5 and 7.4 for various time. Mean  $\pm$  SD ( $n = 3$ ).**

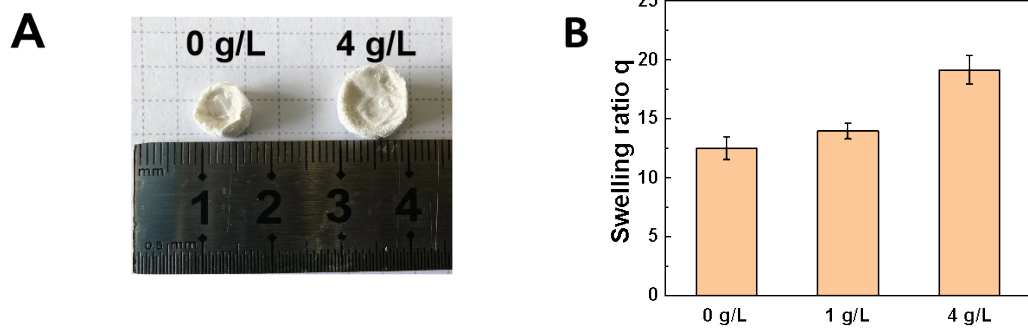

**Fig. S5. (A) Macroscopic appearance of 6.7 LME- (PLP-PBA-12%) hydrogel at a glucose concentration of 0 g/L and 4 g/L. (B) Swelling ratio  $q$  of 6.7 LME- (PLP-PBA-12%) hydrogel at a glucose concentration of 0 g/L and 4 g/L for various time. Mean  $\pm$  SD ( $n = 3$ ).**
